# Supplementary material for: Efficacy of Pemetrexed-based Chemotherapy in Comparison to Non-Pemetrexed-based Chemotherapy in Advanced, ALK+ Non-Small Cell Lung Cancer
Source: PubMed Central journal article supplement — Yonsei Med J. 2018 Feb 5;59(2):202–10. doi: 10.3349/ymj.2018.59.2.202 (PMC5823821; doi:10.3349/ymj.2018.59.2.202), 2018-02-05
Supplement: ymj-59-202-s001.pdf [file ymj-59-202-s001.pdf]

**Supplementary Table 1.** Molecular Profiling of Patients

| <b>Characteristics</b>               | <b>Pemetrexed-based (n=48)</b> | <b>Non-pemetrexed-based (n=78)</b> | <b>p value</b> |
|--------------------------------------|--------------------------------|------------------------------------|----------------|
| ALK expression, n (%)                | 39 (81.3)                      | 37 (47.4)                          | 0.649          |
| Negative                             | 0 (0.0)                        | 0 (0.0)                            | 0 (0.0)        |
| 1+                                   | 3 (7.7)                        | 6 (16.2)                           | 9 (11.8)       |
| 2+                                   | 20 (51.3)                      | 10 (27.0)                          | 30 (39.5)      |
| 3+                                   | 16 (41.0)                      | 21 (56.8)                          | 37 (48.7)      |
| ALK FISH result, available           | 35 (72.9)                      | 48 (61.5)                          |                |
| Mean break apart signal (%), mean±SD | 50.4±18.5                      | 50.4±20.0                          | 0.984          |
| EGFR mutation, n (%)                 | 0 (0.0)                        | 0 (0.0)                            | NA             |
| KRAS mutation, n (%)                 | 0 (0.0)                        | 0 (0.0)                            | NA             |

ALK, anaplastic lymphoma kinase; FISH, fluorescence in situ hybridization; SD, standard deviation; EGFR, epidermal growth factor receptor.
