# Supplementary material for: Efficacy of Pemetrexed-based Chemotherapy in Comparison to Non-Pemetrexed-based Chemotherapy in Advanced, ALK+ Non-Small Cell Lung Cancer
Source: PubMed Central journal article supplement — Yonsei Med J. 2018 Feb 5;59(2):202–10. doi: 10.3349/ymj.2018.59.2.202 (PMC5823821; doi:10.3349/ymj.2018.59.2.202), 2018-02-05
Supplement: ymj-59-202-s002.pdf [file ymj-59-202-s002.pdf]

**Supplementary Table 2.** Treatment Summaries of the Study Patients

| Characteristics                        | Pemetrexed based (n=48) | Non-pemetrexed-based (n=78) | p value |
|----------------------------------------|-------------------------|-----------------------------|---------|
| First-line cytotoxic treatment, n (%)  |                         |                             |         |
| Pemetrexed/cisplatin                   | 41 (32.5)               |                             |         |
| Pemetrexed monotherapy                 | 7 (5.6)                 |                             |         |
| Gemcitabine+cisplatin/carboplatin      |                         | 62 (49.2)                   |         |
| Gemcitabine monotherapy                |                         | 2 (1.6)                     |         |
| Irinotecan/cisplatin                   |                         | 1 (0.8)                     |         |
| Paclitaxel/cisplatin (carboplatin)     |                         | 12 (9.5)                    |         |
| Vinorelbine monotherapy                |                         | 1 (0.8)                     |         |
| ALKi                                   |                         |                             |         |
| Exposure to ALKi, n (%)                | 43 (89.6)               | 73 (93.6)                   | 0.267   |
| Number of ALKi (mean±SD)               | 1.2±0.6                 | 1.3±0.5                     | 0.181   |
| Exposure to 2nd generation ALKi, n (%) | 16 (33.3)               | 27 (34.6)                   | 0.848   |
| Ceritinib                              | 12 (25.0)               | 15 (19.2)                   |         |
| Alectinib                              | 1 (2.1)                 | 6 (7.7)                     |         |
| Brigatinib                             | 3 (6.3)                 | 6 (7.7)                     |         |
| ALKi after PD, n (%)                   | 14 (29.2)               | 31 (39.7)                   | 0.190   |
| Overall pemetrexed exposure, n (%)     | 48 (100.0)              | 50 (64.1)                   | <0.001  |
| Initial intracranial metastasis, n (%) | 16 (33.3)               | 16 (20.5)                   | 0.108   |
| Local treatment                        | 12 (75.0)               | 7 (43.8)                    |         |
| Systemic chemotherapy                  | 4 (25.0)                | 9 (56.2)                    |         |

ALK, anaplastic lymphoma kinase; SD, standard deviation; ALKi, anaplastic lymphoma kinase inhibitor; PD, progressive disease.
