# Supplementary material for: Efficacy of Pemetrexed-based Chemotherapy in Comparison to Non-Pemetrexed-based Chemotherapy in Advanced, ALK+ Non-Small Cell Lung Cancer
Source: PubMed Central journal article supplement — Yonsei Med J. 2018 Feb 5;59(2):202–10. doi: 10.3349/ymj.2018.59.2.202 (PMC5823821; doi:10.3349/ymj.2018.59.2.202), 2018-02-05
Supplement: ymj-59-202-s003.pdf [file ymj-59-202-s003.pdf]

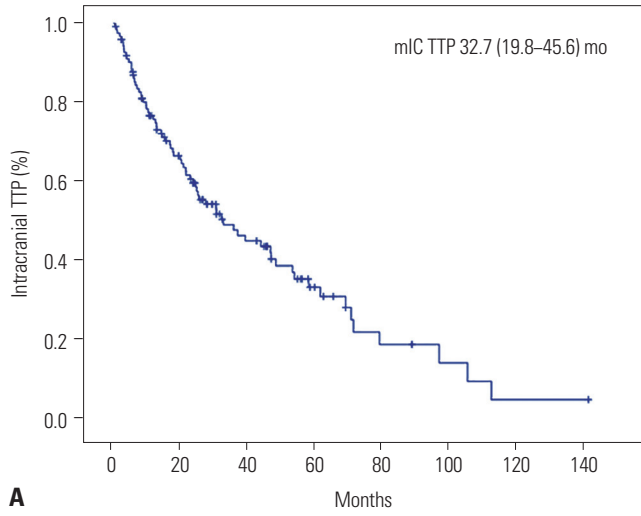

**A**

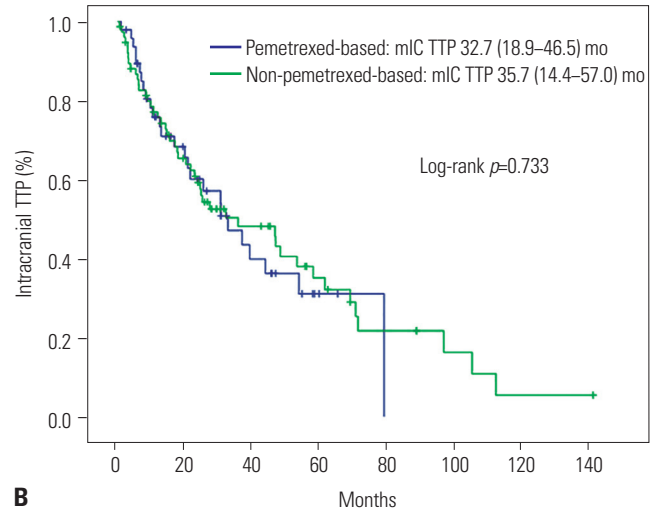

**B**

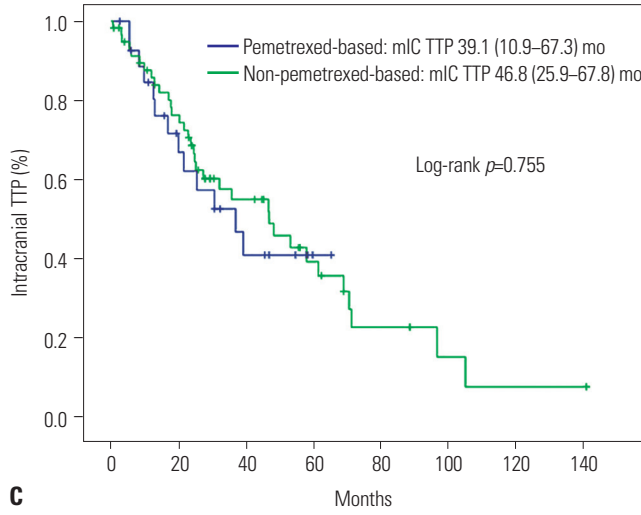

**C**

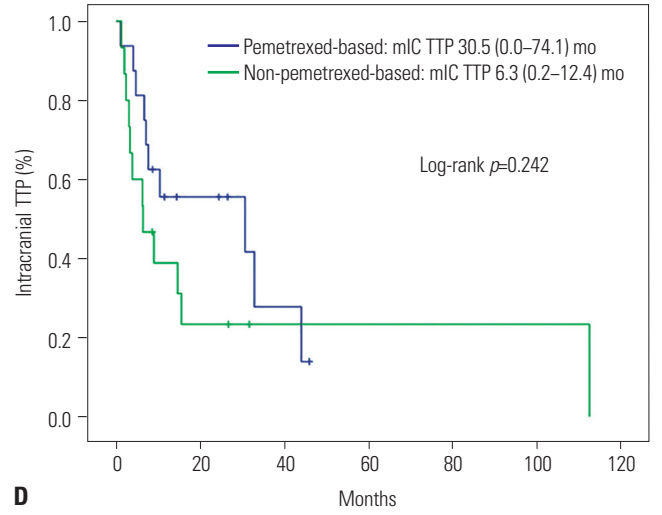

**D**

**Supplementary Fig. 1.** Overall intracranial TTP (A), as well as TTP, according to first-line cytotoxic treatment in all patients (B), negative intracranial disease status at initial presentation (C), and positive intracranial disease status at initial presentation (D). TTP, time to tumor progression; mIC, median intracranial; mo, months.
